# Supplementary material
Source: PubMed Central journal article supplement (PMC4615688)

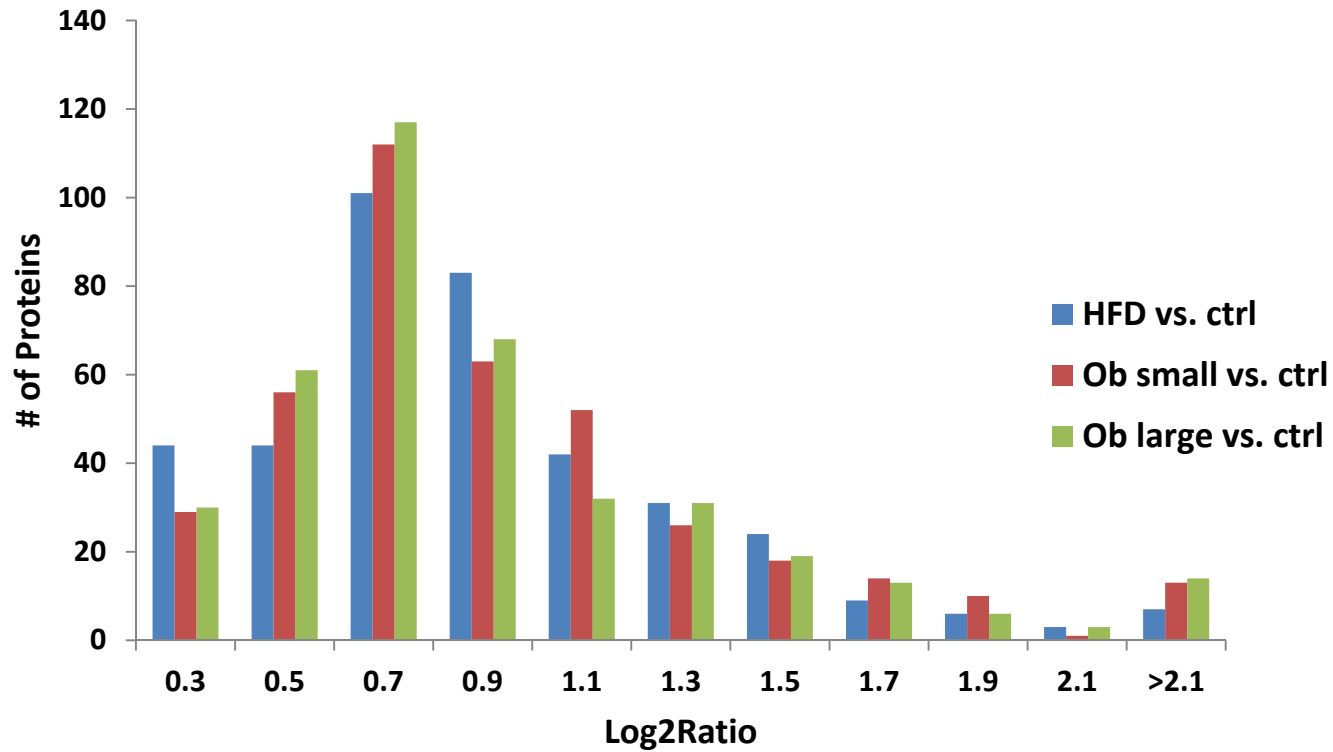

Supplemental Figure S1: Histograms of the extent of changes for ~350 significantly altered proteins. The changes are displayed in absolute values of log2ratio.

Supplemental Figure S2: Examples of XICs from SRM measurements

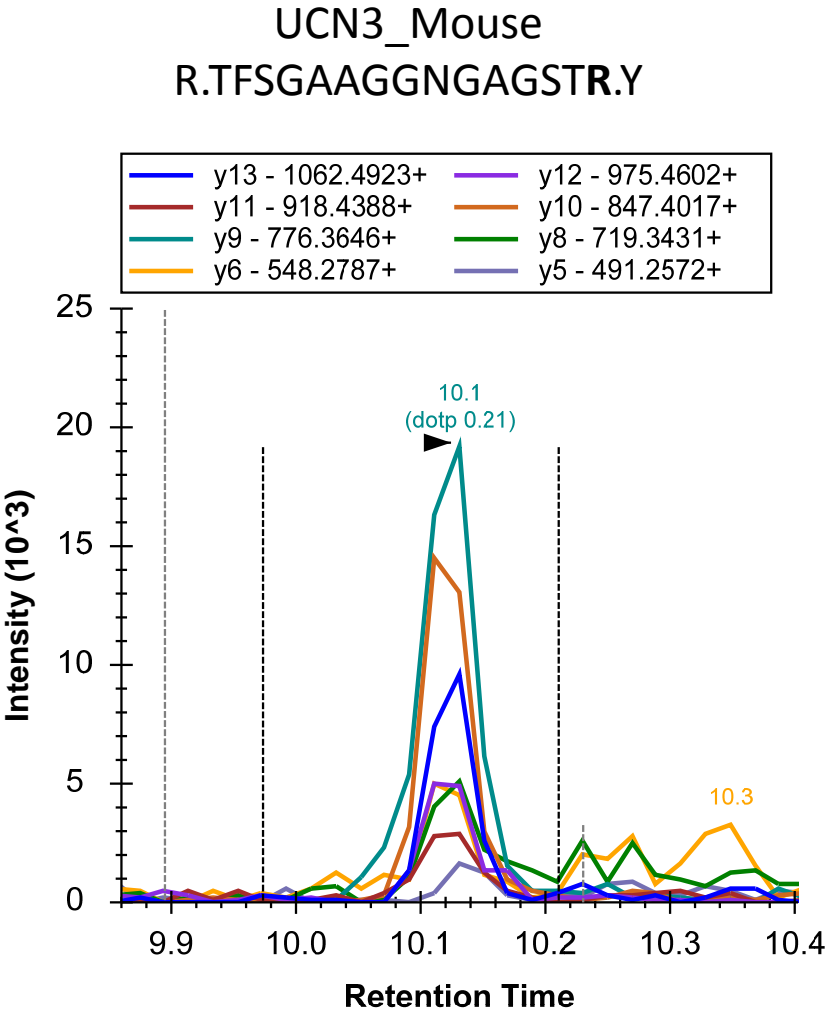

An example of confident detection of the targeted peptide by monitoring six or more transitions in the initial screening.

VINC\_Mouse  
K.MSAEINEIR.V

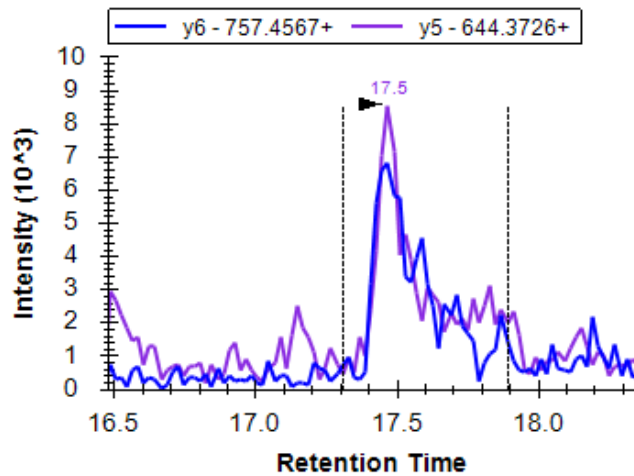

UCN3\_Mouse  
R.TFSGAAGGNGAGSTR.Y

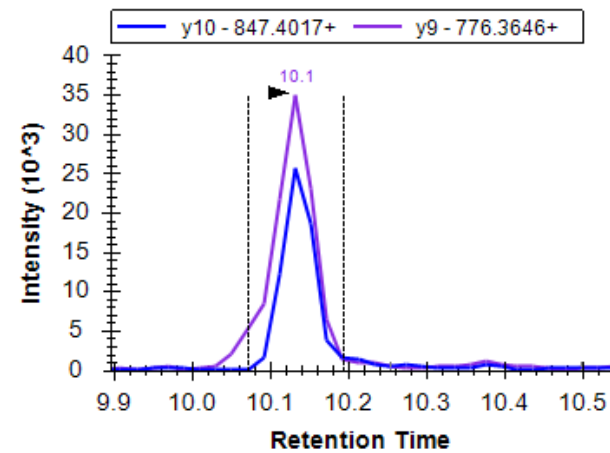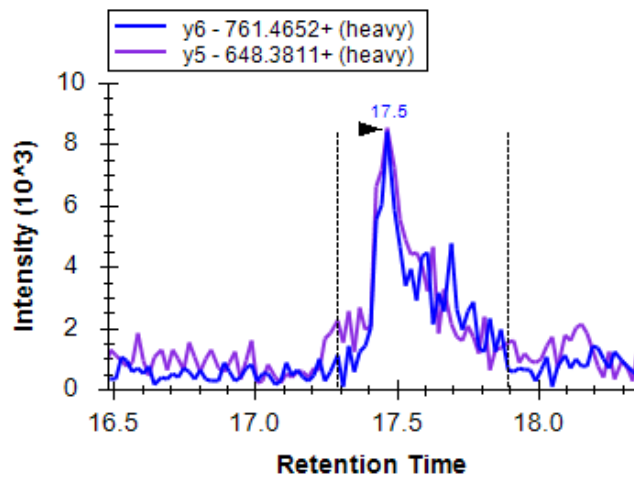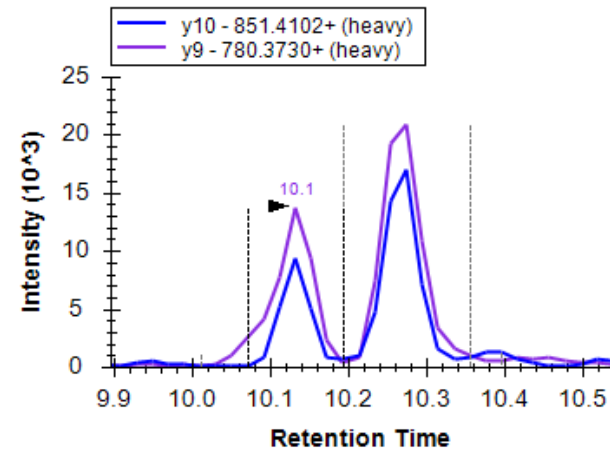

Note: two best transitions were selected for final quantification.  
Bottom panels: XICs of Transitions from the  $^{18}\text{O}$ -labeled reference sample.  
Upper panels: XICs of transition from endogenous islet samples.

SMS\_Mouse  
R.SANSPAMAPR.E

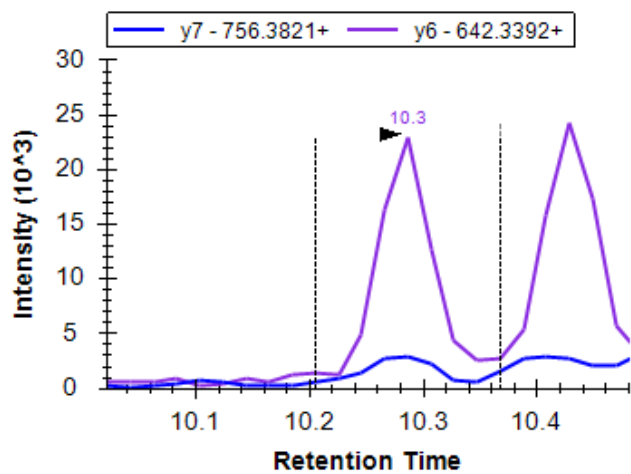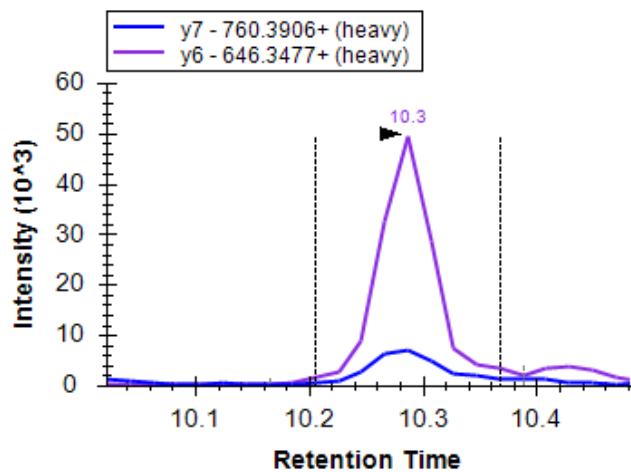

SE6L2\_Mouse  
R.TASDAGFPVGS HVQYR.C

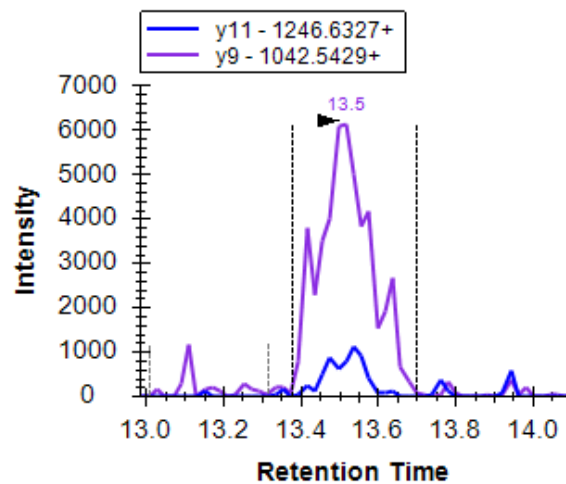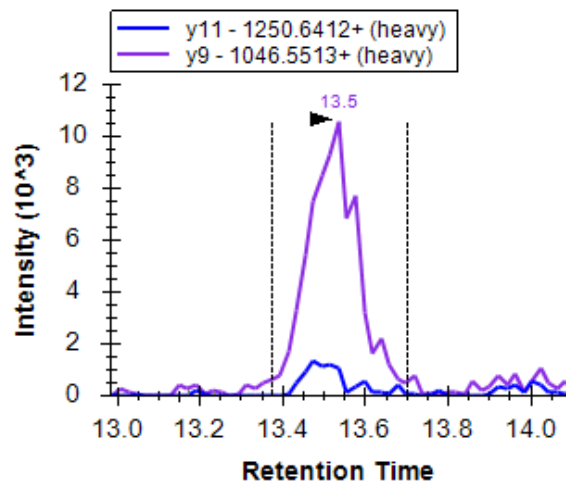

SE1L1\_Mouse

K.AADMGNPVGQSGLGMAYLYGR.G

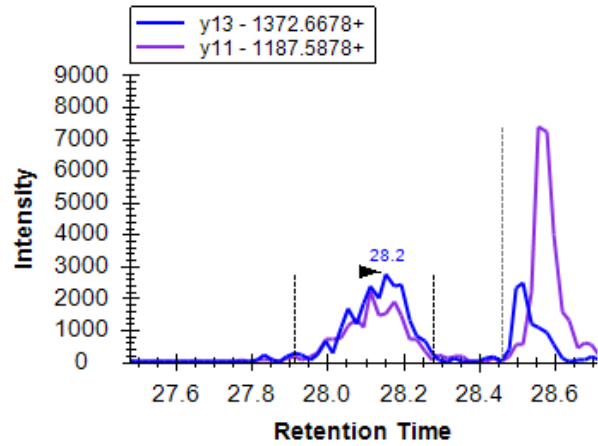

SND\_Mouse

R.QINLSNIR.A

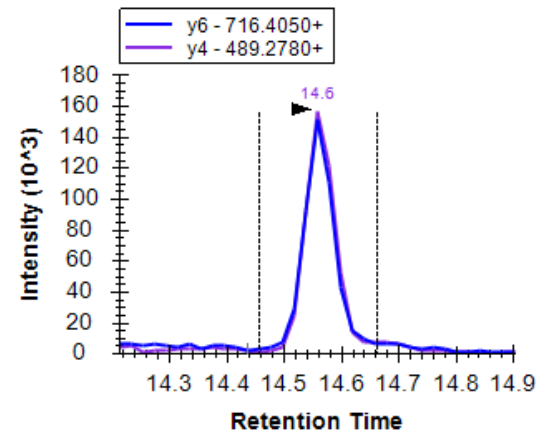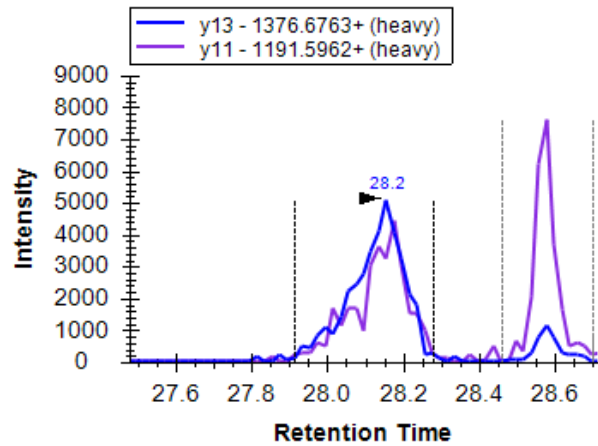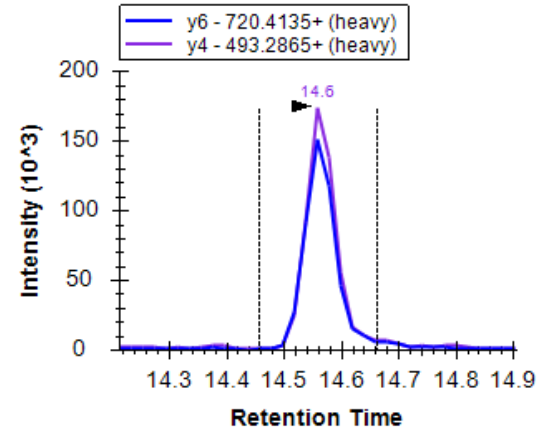

S61A1\_Mouse  
R.ETSMVHELNR.Y

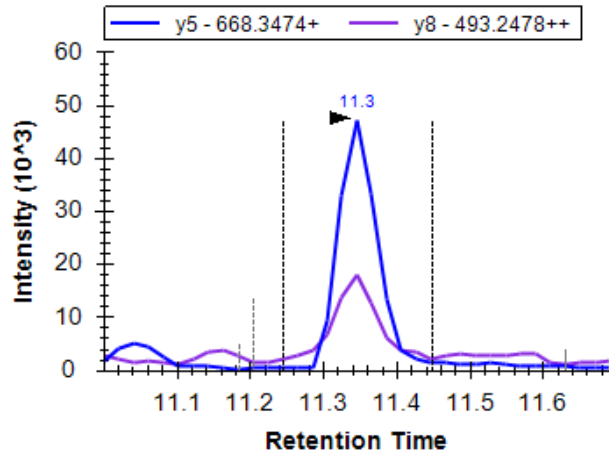

PYY\_Mouse  
R.HYLNLVTR.Q

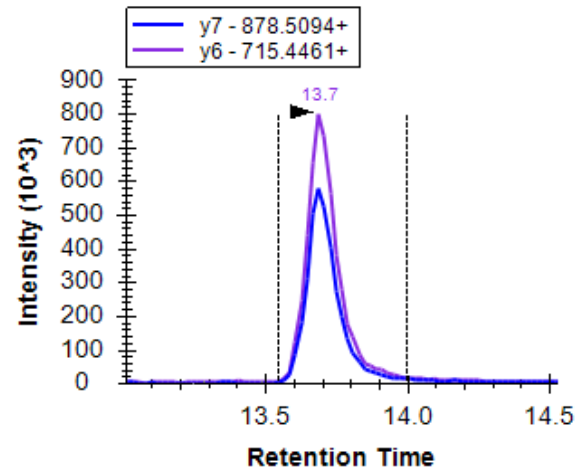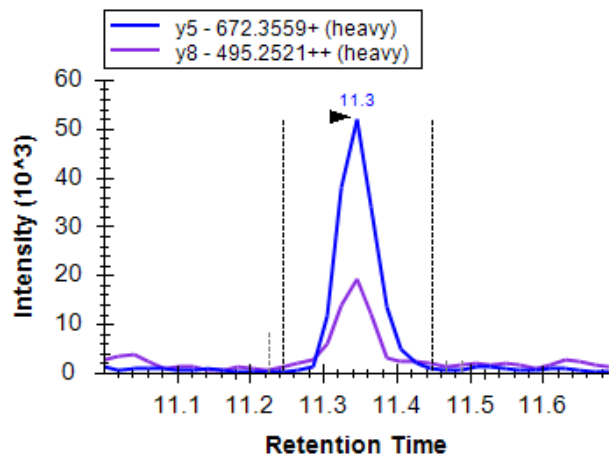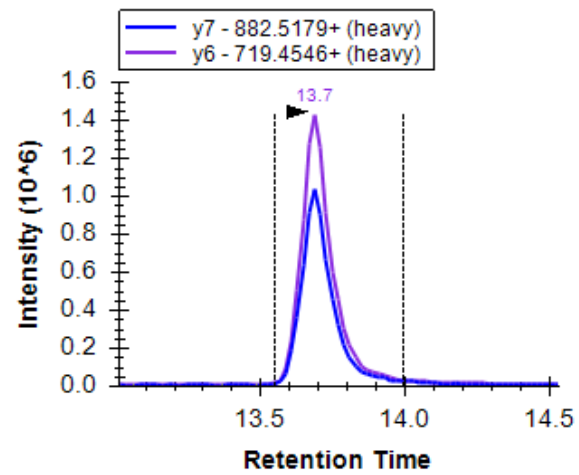

Supplement: NIHMS724189-supplement-Supplemental_figures.pdf [file NIHMS724189-supplement-Supplemental_figures.pdf]
